# Supplementary material
Source: PubMed Central journal article supplement (PMC6685055)
Supplement: ic9b00767_si_001.pdf [file ic9b00767_si_001.pdf]

## Supporting Information

# Mononuclear Manganese(III) Superoxo Complexes: Synthesis, Characterization and Reactivity

Yen-Hao Lin,<sup>†</sup> Hanna Hinrika Cramer,<sup>‡</sup> Maurice van Gastel,<sup>⊥</sup> Yi-Hsuan Tsai,<sup>†</sup> Chi-Yi Chu,<sup>†</sup>  
Ting-Shen Kuo,<sup>#</sup> I-Ren Lee,<sup>\*,†</sup> Shengfa Ye,<sup>\*,⊥</sup> Eckhard Bill,<sup>\*,‡</sup> and Way-Zen Lee<sup>\*,†</sup>

<sup>†</sup>Department of Chemistry, National Taiwan Normal University, Taipei 11677, Taiwan

<sup>‡</sup>Department of Molecular Theory and Spectroscopy, Max-Planck-Institut für Chemische  
Energiekonversion, Mülheim an der Ruhr D-45470, Germany

<sup>⊥</sup>Department of Molecular Theory and Spectroscopy, Max-Planck-Institut für  
Kohlenforschung, Mülheim an der Ruhr D-45470, Germany

<sup>#</sup>Instrumentation Center, Department of Chemistry, National Taiwan Normal University,  
Taipei 11677, Taiwan

\*Corresponding author. Email: wzlee@ntnu.edu.tw (W.-Z.L); shengfa.ye@kofo.mpg.de  
(S.Y.); eckhard.bill@cec.mpg.de (E.B.); irenlee@ntnu.edu.tw (I.-R.L)

|                 |
|-----------------|
| Contents        |
| Figures S1-S18  |
| Tables S1-S5    |
| References 1-16 |

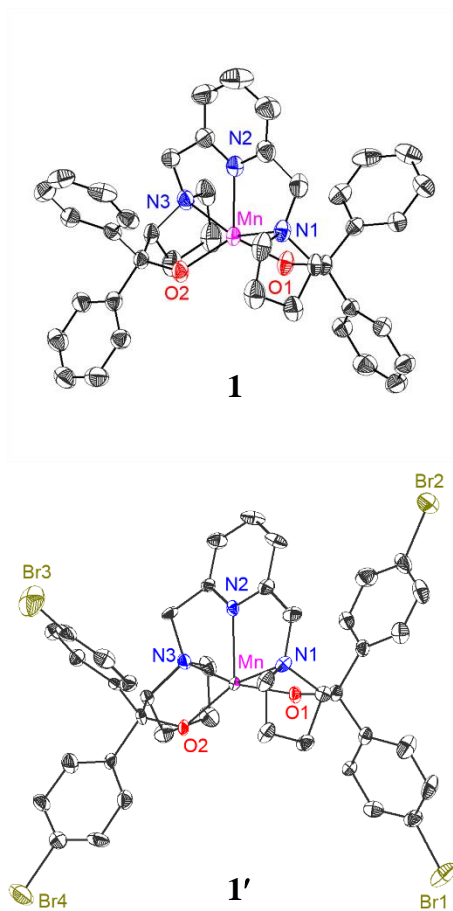

**Figure S1.** ORTEP presentation of Mn(BDPP) (**1**) and Mn(BDP<sup>Br</sup>P) (**1'**). Hydrogen atoms are omitted for clarity.

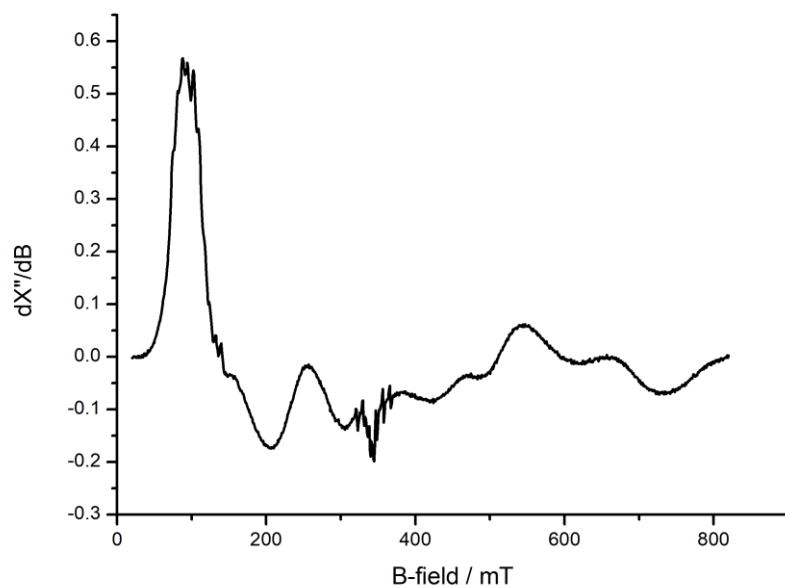

**Figure S2.** EPR spectrum of **1** (1 mM) in MeTHF recorded at 10 K. (Frequency 9.65629 GHz, power 0.2 mW, modulation 100 kHz/0.75 mT)

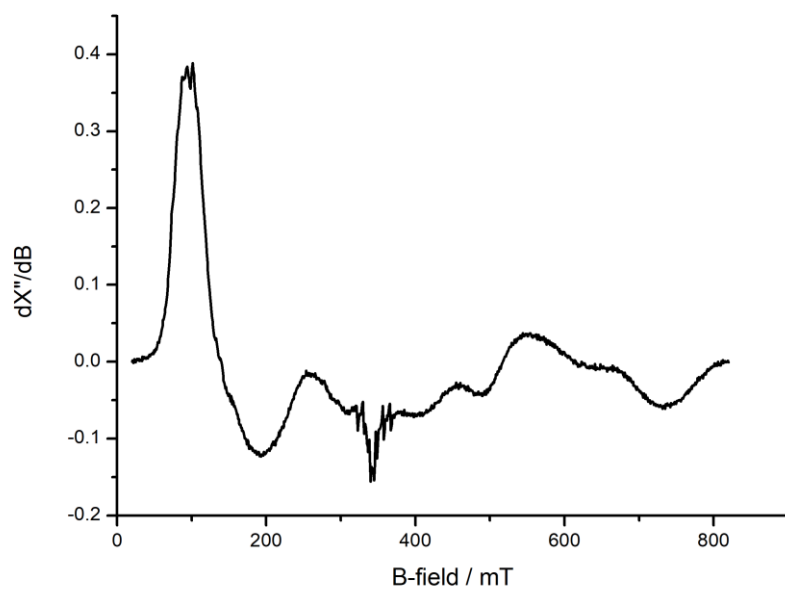

**Figure S3.** EPR spectrum of **1'** (1 mM) in MeTHF recorded at 10 K. (Frequency 9.65864 GHz, power 0.2 mW, modulation 100 kHz/0.75 mT)

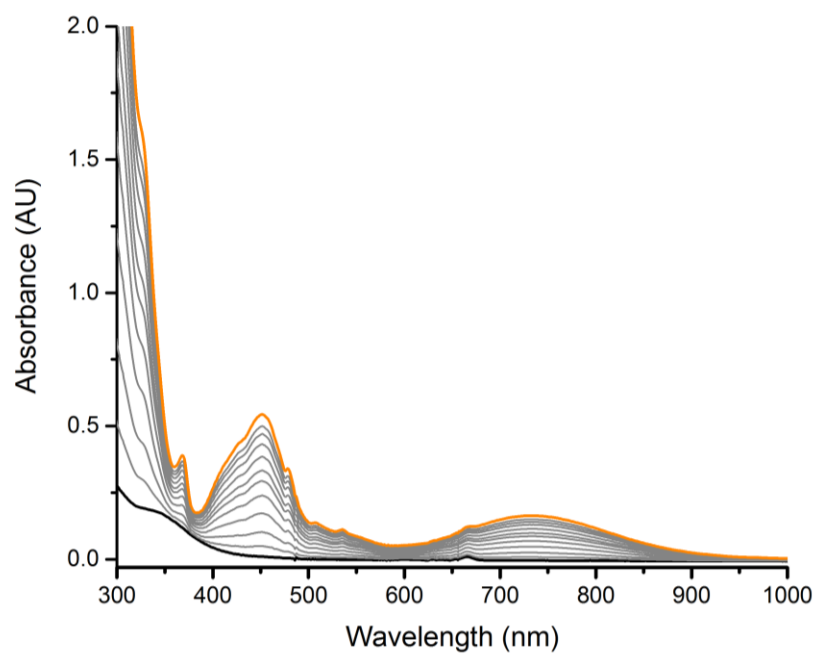

**Figure S4.** UV-vis spectra of **1** (black, 0.4 mM) reacting with O<sub>2</sub> forming **2** (orange, 0.4 mM) in THF at -80 °C.

(a)

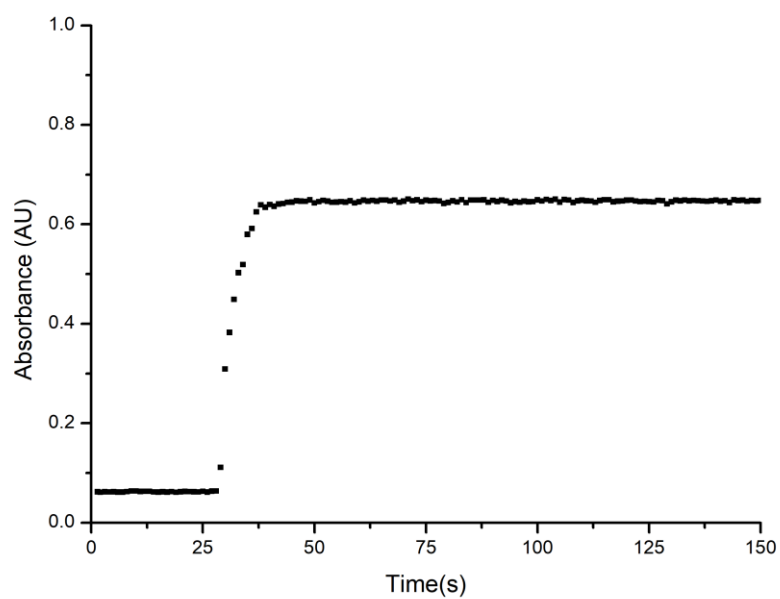

(b)

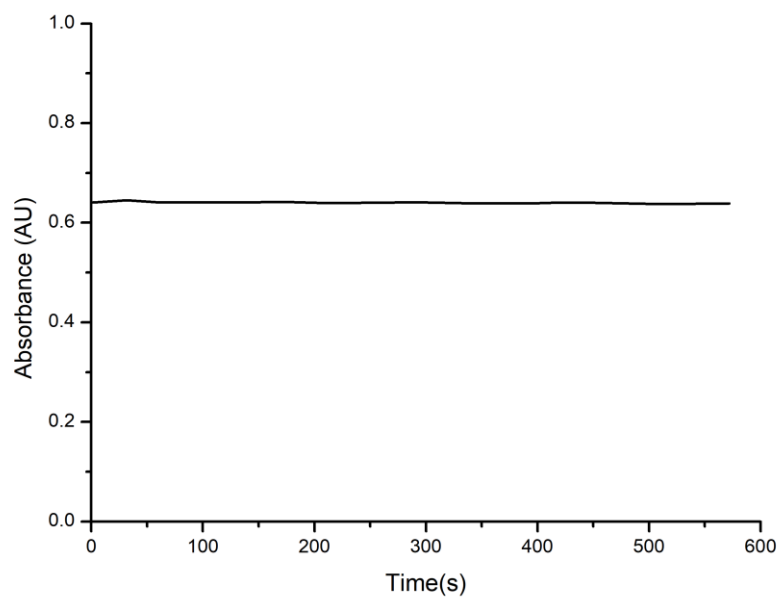

**Figure S5.** (a) The trace of formation of **2'** (0.4 mM) by bubbling O<sub>2</sub> into a THF solution of **1** from the monitoring for the absorption band at 450 nm; (b) The trace of retention of **2'** in THF (0.4 mM) from purging the solution with argon for 10 mins at -80 °C.

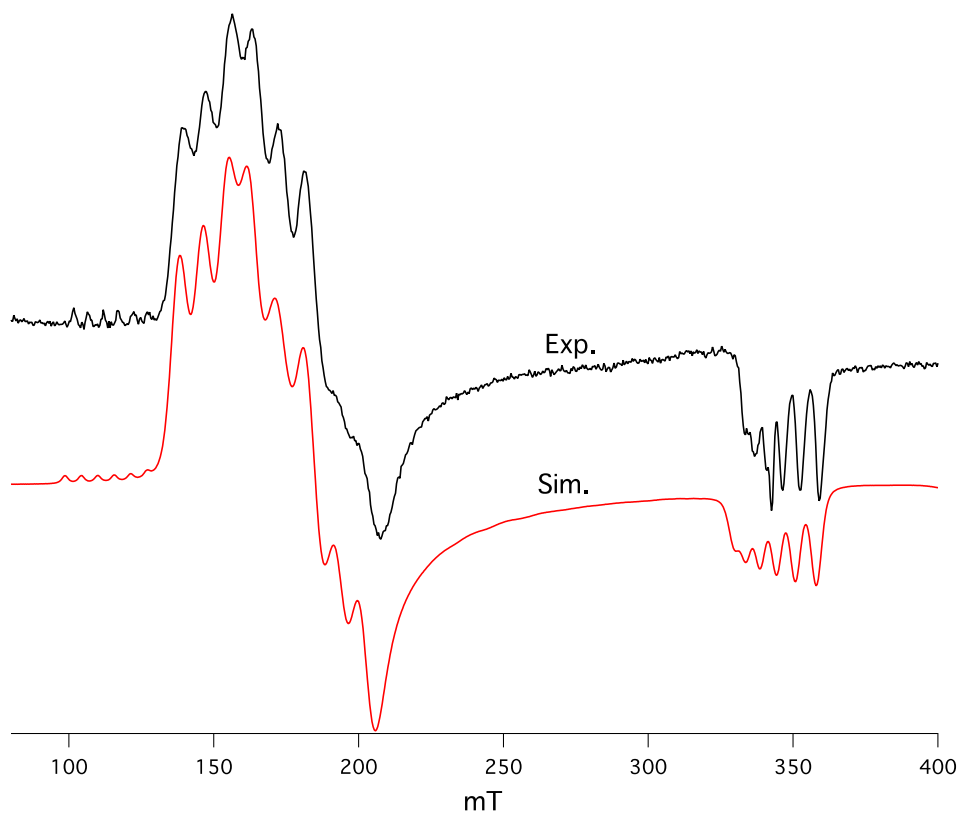

**Figure S6.** EPR spectrum of **2** (1 mM) recorded at 10 K. (Frequency 9.655 GHz, power 0.2 mW, modulation 100 kHz/0.75 mT). The simulation was obtained by the following parameter,  $g_{\text{iso}} = 1.997(10)$ ,  $D = -5.4(5) \text{ cm}^{-1}$ ,  $E/D = 0.05(1)$ , and  $|A_{x,y,z}| = 237(10)$ ,  $223(10)$ ,  $158(10) \text{ MHz}$ . The spin concentration of the superoxo complex with  $S = 3/2$  was determined two different samples to be ca. 95 and 99 % of the chemical concentration (2 mM), with ca.  $\pm 10\%$  error. To this end, the prominent subspectrum from the ‘allowed’ transitions within the excited Kramers doublet ( $m_s = \pm 1/2$ ) with effective  $g$  values at 4 and 2 was numerically double-integrated in the field range 130 – 380 mT, and compared with the integrated spectrum of a 1mM Cu(II) standard measured at non-saturating conditions (30 K, 0.05 mW). Both spectra were corrected for different Aasa-Vanngard factors for field-swept spectra, arising from different (effective)  $g$  values.<sup>1</sup> In addition, the  $m_s = \pm 1/2$  subspectrum of the target compound **2** was corrected for the corresponding Boltzmann factor of the excited state by using  $D = -5.2 \text{ cm}^{-1}$  taken from the analysis of the temperature variation described in the main text.

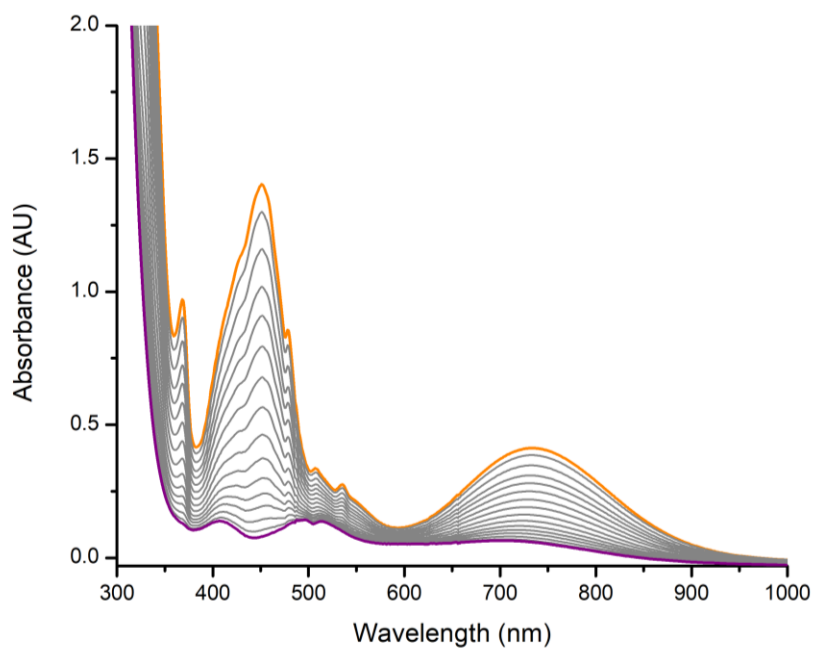

**Figure S7.** UV-vis spectra of **2** (orange line, 1 mM) reacting with 10 equivalents of TEMPOH in THF at  $-90\text{ }^{\circ}\text{C}$ . Purple line represents  $\text{Mn}^{\text{III}}(\text{BDPP})(\text{OOH})$  (**5**) with four absorption bands at 410, 495, 515 and 720 nm.

(a)

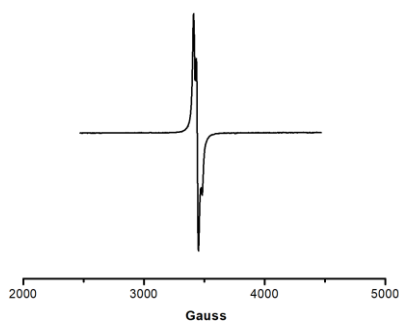

(b)

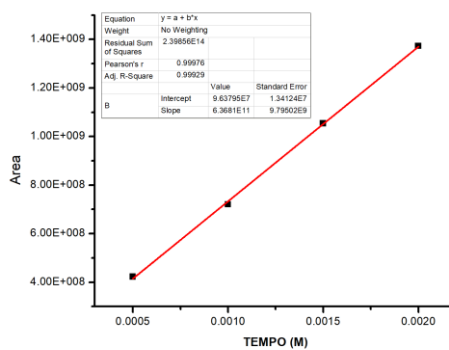

**Figure S8.** (a) EPR signal ( $g = 2.006$ , 77K) of the produced TEMPO radical (integrated area:  $6.5 \times 10^8$ , 86% vs calibration) obtained from the reaction of **2** ( $1.0 \times 10^{-3}$  M) with 10 equivalents of TEMPOH at  $-90$  °C; (b) the calibration curve of TEMPO radical.

(a)

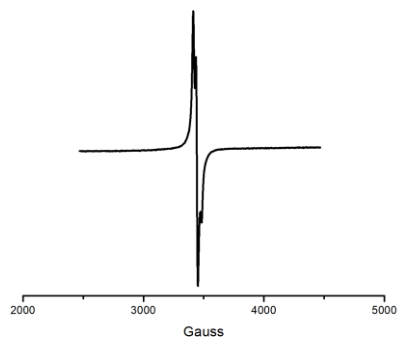

(b)

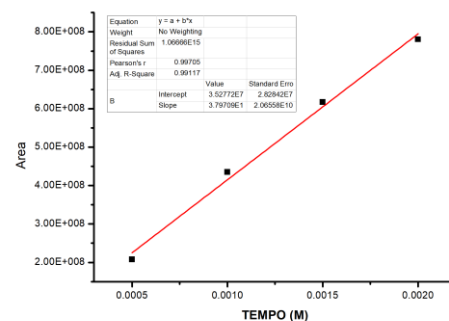

**Figure S9.** (a) EPR signal ( $g = 2.006$ , 77K) of the produced TEMPO radical (integrated area:  $3.8 \times 10^8$ , 93% vs calibration) obtained from the reaction of **2'** ( $1.0 \times 10^{-3}$  M) with 10 equivalents of TEMPOH at  $-90$  °C; (b) the calibration curve of TEMPO radical.



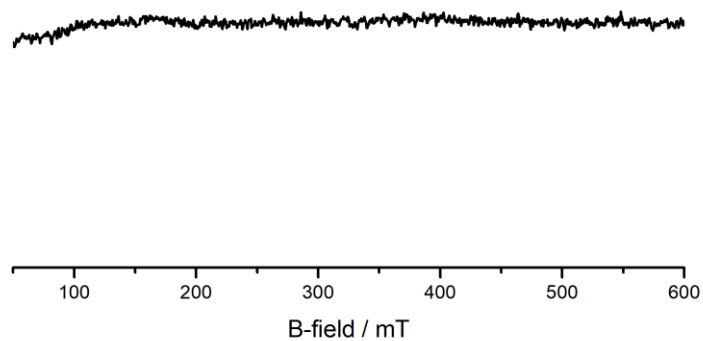

**Figure S10.** EPR spectrum of **6'** (1 mM) recorded at 10 K. (Frequency 9.388 GHz, power 0.2 mW, modulation 100 kHz/0.75 mT).

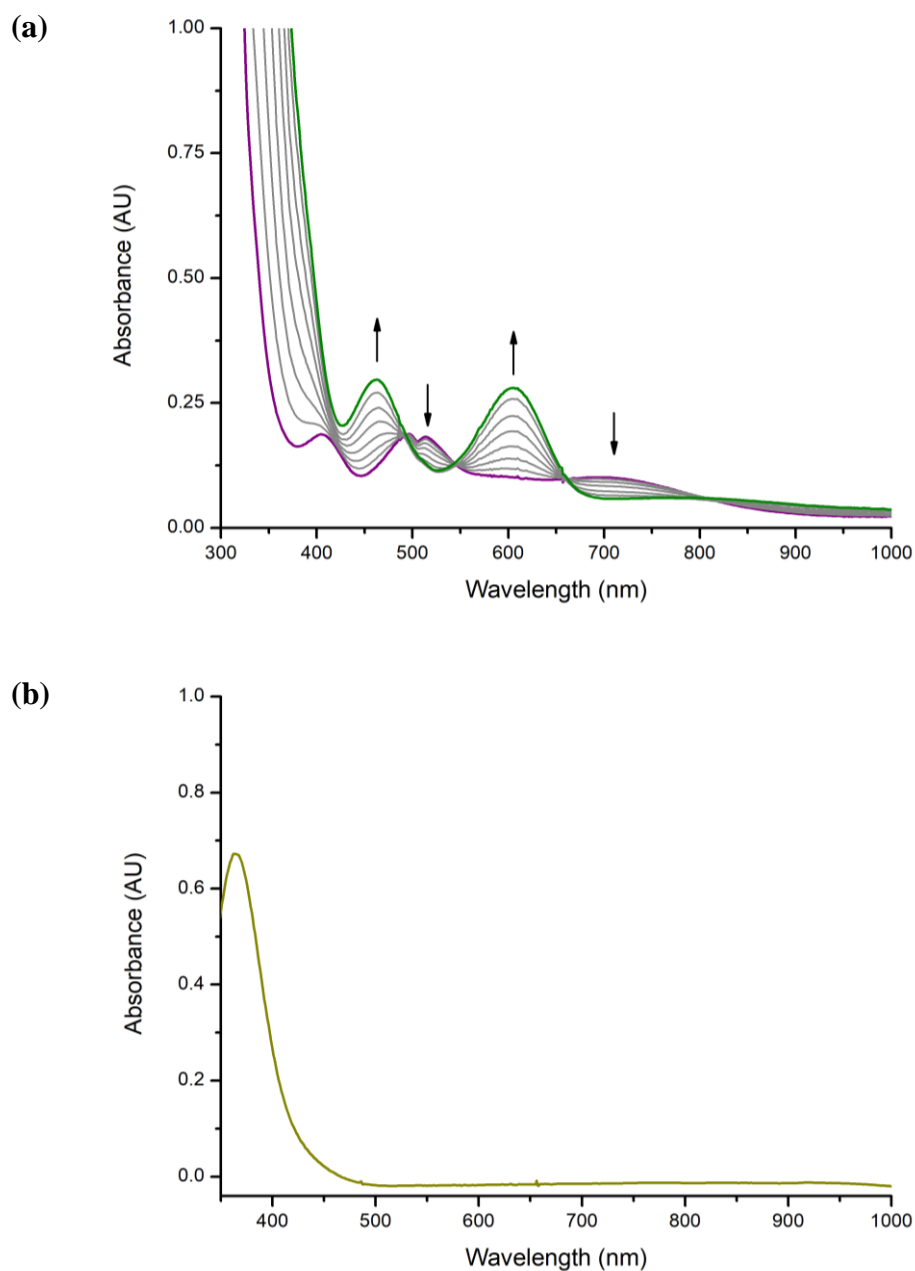

**Figure S11.** (a) Reaction of **5** with one equiv of HOTf in THF forming  $[Mn(BDPP)(H_2O)]OTf$  (**6**), which was subsequently warmed up. (b) 100  $\mu$ L of the resulting solution was added into an acetone solution of excess NaI to examine the yield of the produced  $H_2O_2$ . The theoretical concentration of the in situ generated  $I_3^-$  solution is  $3.2 \times 10^{-5}$  M. The amount of the formed  $I_3^-$  was then quantified using its visible spectrum ( $\lambda_{max} = 361$  nm,  $\epsilon = 2.5 \times 10^4$  M $^{-1}$  cm $^{-1}$ ).

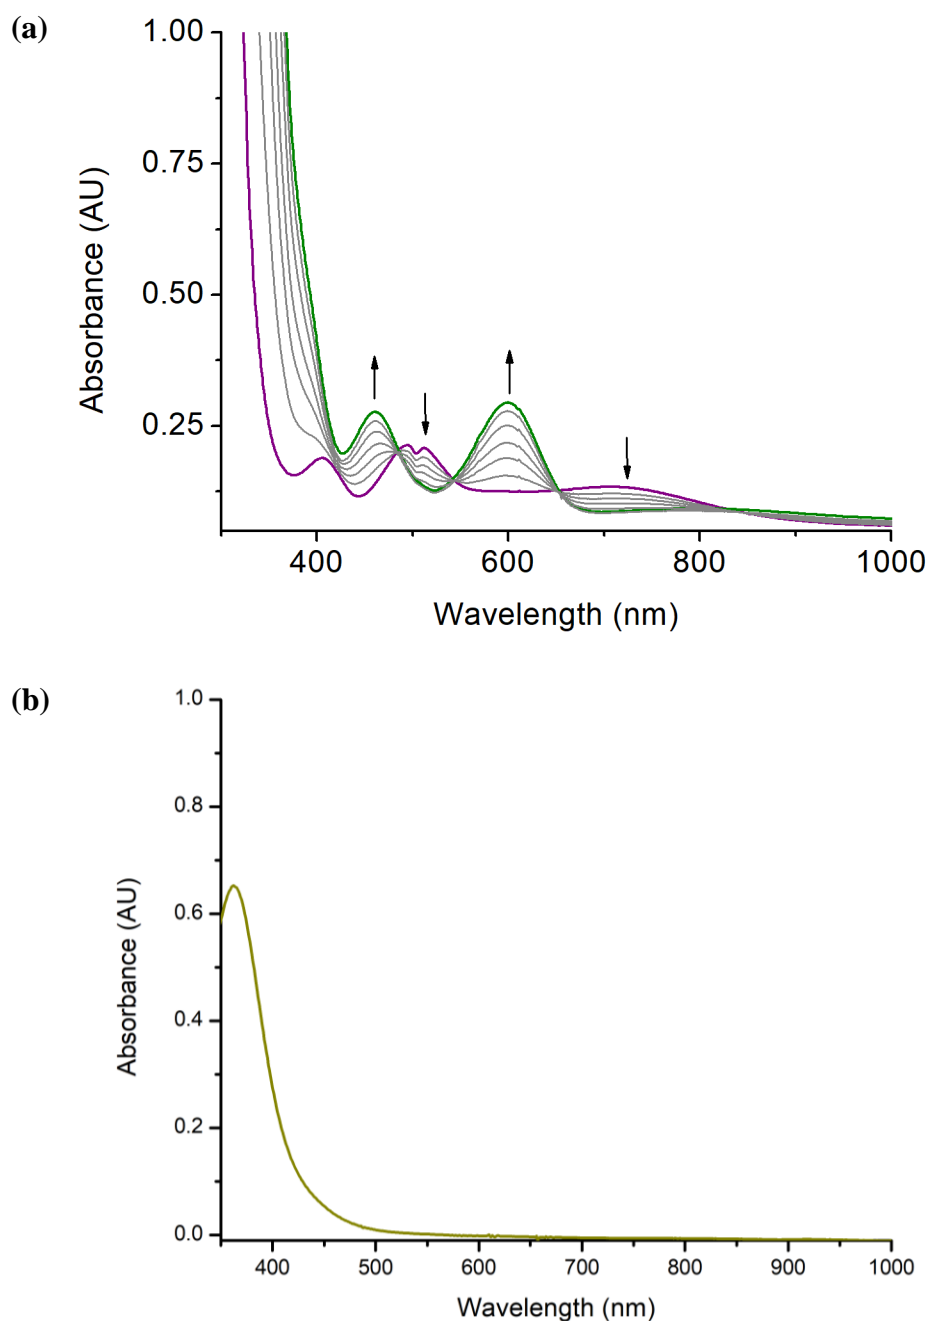

**Figure S12.** (a) Reaction of **5'** with one equiv of HOTf in THF forming  $[\text{Mn}(\text{BDP}^{\text{BrP}})(\text{H}_2\text{O})]\text{OTf}$  (**6'**), which was subsequently warmed up. (b) 100  $\mu\text{L}$  of the resulting solution was added into an acetone solution of excess NaI to examine the yield of the produced  $\text{H}_2\text{O}_2$ . The theoretical concentration of the in situ generated  $\text{I}_3^-$  solution is  $3.2 \times 10^{-5}$  M. The amount of the formed  $\text{I}_3^-$  was then quantified using its visible spectrum ( $\lambda_{\text{max}} = 361$  nm,  $\epsilon = 2.5 \times 10^4$   $\text{M}^{-1} \text{cm}^{-1}$ ).

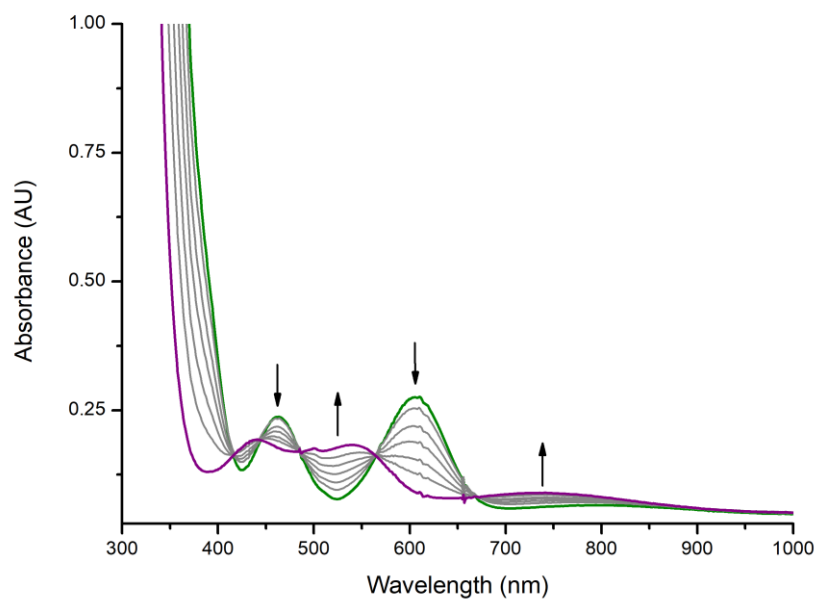

**Figure S13.** UV-vis spectra change monitored from the reaction of  $[\text{Mn}(\text{BDPP})(\text{H}_2\text{O})]\text{OTf}$  (**6**) (green line, 1 mM) with excess  $\text{H}_2\text{O}_2/\text{NEt}_3$  2:1 mixture in THF at  $-90\text{ }^\circ\text{C}$ . The purple line represents  $\text{Mn}(\text{BDPP})(\text{OOH})$  (**5**).

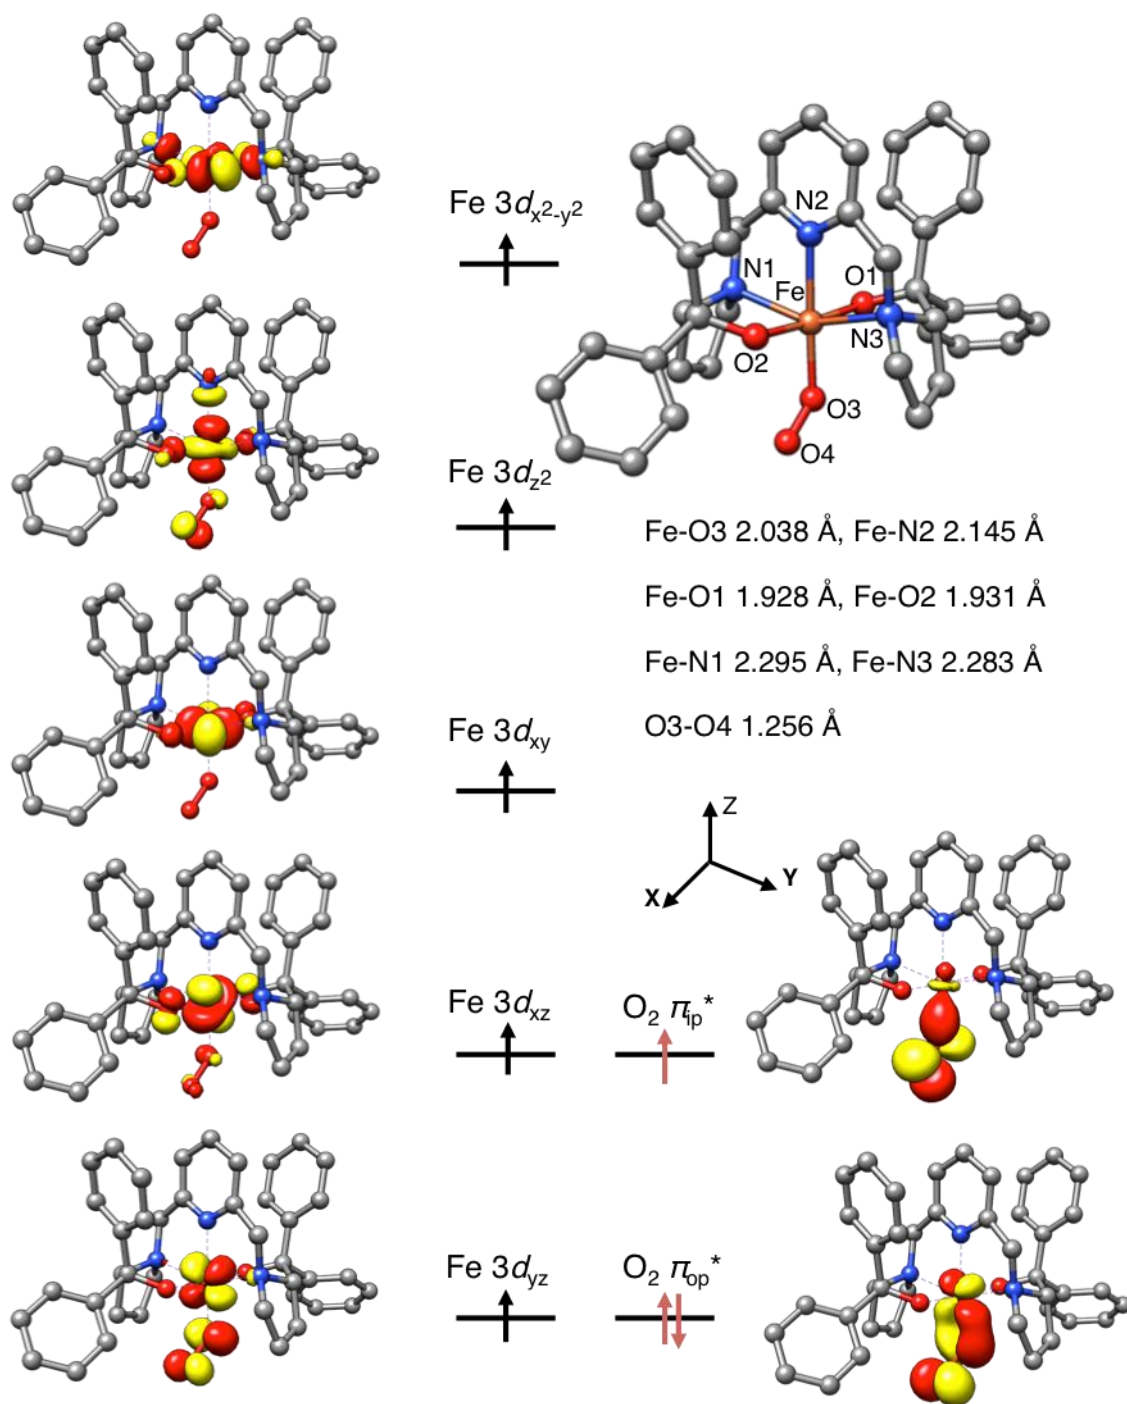

**Figure S14.** Computed structure of  $S = 3$   $\text{Fe}^{\text{III}}$ -superoxo **3** with key geometric parameters and its schematic molecular orbital diagram.

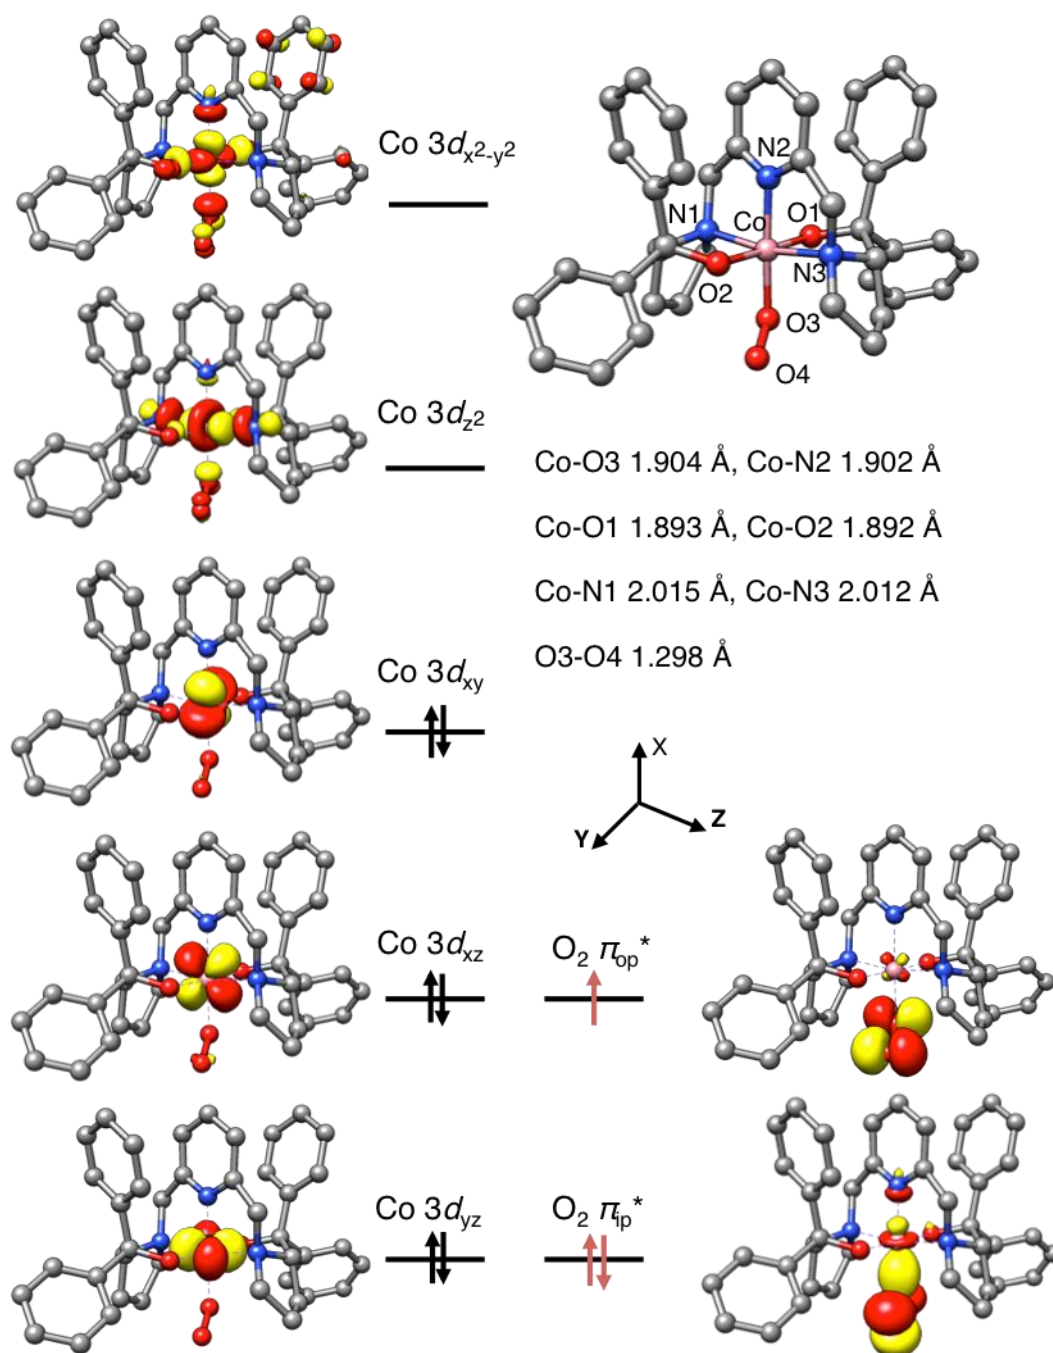

**Figure S15.** Computed structure of  $S = \frac{1}{2}$   $Co^{III}$ -superoxo **4** with key geometric parameters and its schematic molecular orbital diagram.

For most transition metal complexes, the zero-field splitting arises from 2<sup>nd</sup> order spin-orbit coupling between the ground and excited states. A negative  $D$  value is usually found for a high spin  $d^4$  center in a elongated octahedral coordination environment, because

$$D = -\frac{1}{4} \frac{\zeta^2}{\Delta({}^5B_{2g})} + \frac{1}{16} \frac{\zeta^2}{\Delta({}^5E_g)} - \frac{1}{4} \frac{\zeta^2}{\Delta({}^3E_g)}$$

here  $\zeta$  is the effective spin-orbit coupling constant of the metal center,  $\Delta$  is the excitation energy of a given excited state.

The hyperfine coupling constant (HFC) is predicted to display a pattern of  $|A_{x,y}| > |A_z|$ , because

$$A_z = A^{FC} + \frac{4}{7} \kappa P$$

$$A_{x,y} = A^{FC} - \frac{2}{7} \kappa P$$

here  $A^{FC}$  is the Fermi-contact contribution to the HFC and is always negative for mononuclear transition metal complexes,  $\kappa < 1$  is the orbital reduction factor and  $P$  is the proportional constant of the nucleus and is negative for  $^{55}\text{Mn}$ . Because the intrinsic  $g$  values of  $\mathbf{2}$  and  $\mathbf{2}'$  are very close to 2, the orbital contribution to the HFC is negligible.

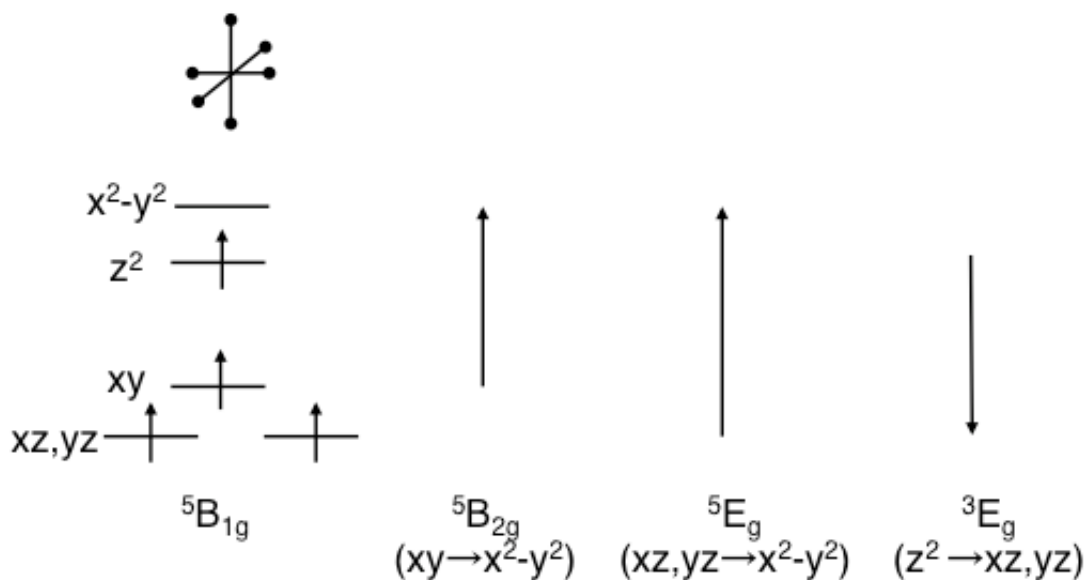

**Figure S16.** Correlation of the coordination geometry of  $\mathbf{2}'$  with its spin Hamiltonian parameters. The ground state of a high spin  $d^4$  center in a elongated octahedral coordination environment and low-lying excited states in  $D_{4h}$  symmetry.

A kinetic titration with  $\sim 2 \times 10^{-4}$  M of **2'** and TEMPOH at 1.0, 1.5, 2.0, 2.5 equivalent concentrations was performed. All these numbers are based on a 100% yield in their preparation processes. The concentration of **2'** was corrected to  $1.86 \times 10^{-4}$  M using the EPR data ( $\sim 93\%$  yield, Figure S10), while the concentrations of TEMPO-H remained unknown. We then performed a titration with the nominal 1.0, 1.5, 2.0, 2.5 equiv of TEMPO-H and fitted to the kinetic model to obtain the actual value of  $n$  and rate constant,  $k$ . The actual value of  $n$  against the nominal  $n$  was plotted and we found that the yield of TEMPO-H generation was  $\sim 80\%$ , which is consistent with the value extracted from the  $^1\text{H}$  NMR spectrum (Figure S18). Therefore, the actual amount of the employed TEMPO-H is 0.8, 1.2, 1.6, and 2.0 equivalents, respectively.

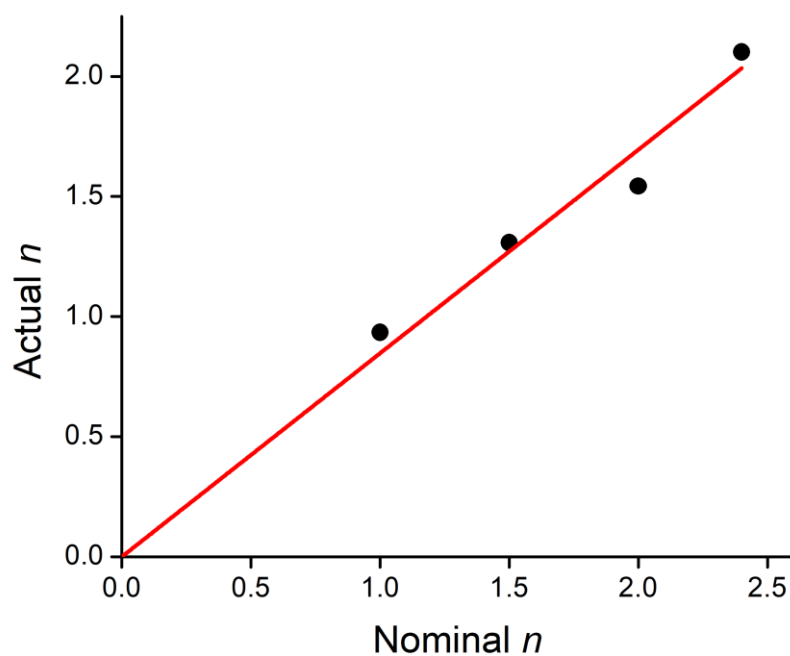

**Figure S17.** The linear plot of the actual value of  $n$  against the nominal  $n$ .



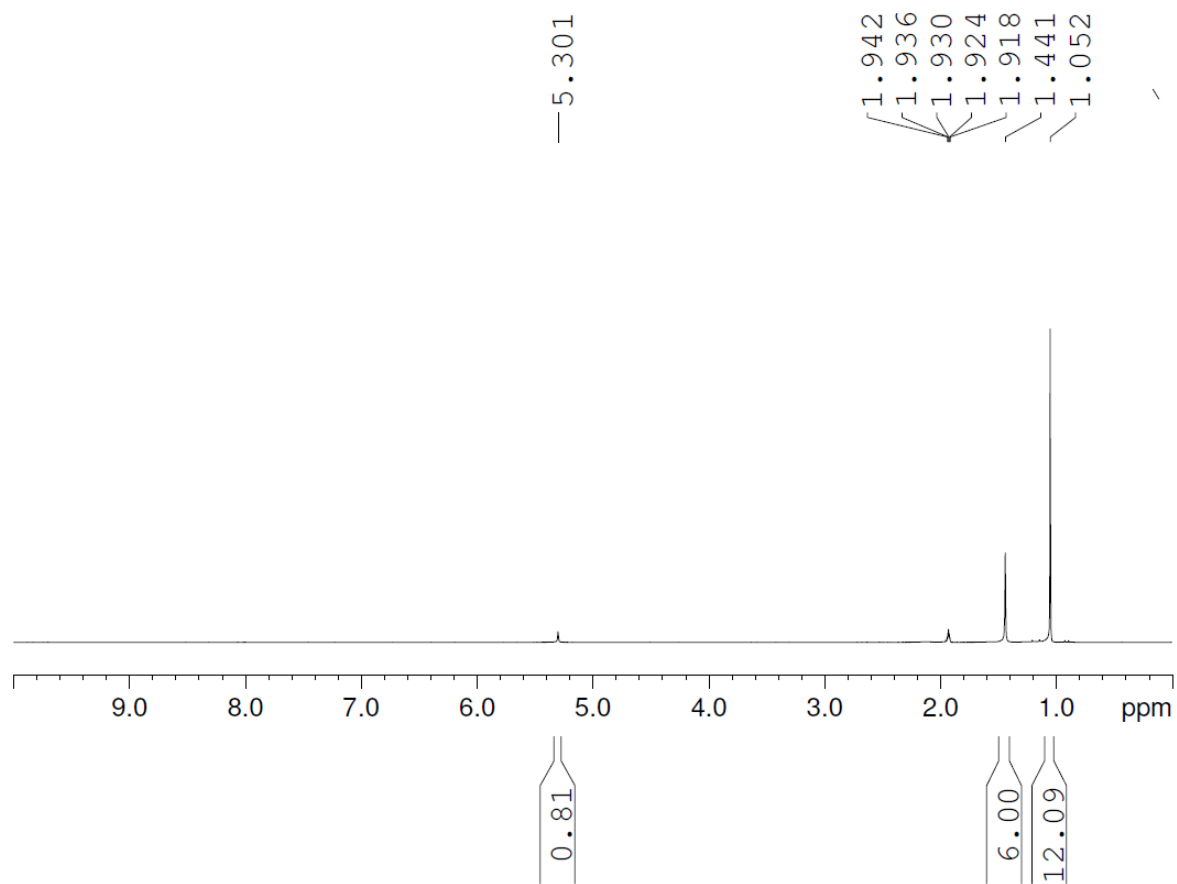

**Figure S18.**  $^1\text{H}$  NMR spectrum of the prepared TEMPO-H in  $\text{CD}_3\text{CN}$ .

**Table S1.** Mn-O bond distances of Mn-(O<sub>2</sub>), Mn-OOR, and Mn-OR (R = H, Me, Ph, Ph-*p*NO<sub>2</sub>) complexes.

| Complex                                                                                                                                        | Mn-O (Å)                                | ref. |
|------------------------------------------------------------------------------------------------------------------------------------------------|-----------------------------------------|------|
| [Mn(O <sub>2</sub> )(TPP)] <sup>-</sup>                                                                                                        | 1.888/1.901                             | 2    |
| [Mn(O <sub>2</sub> )(Tp <sup>iPr2</sup> )(pz <sup>iPr2</sup> )]                                                                                | 1.850/1.851(brown)<br>1.841/1.878(blue) | 3    |
| Tp <sup>iPr2</sup> Mn(η <sup>2</sup> -O <sub>2</sub> )(im <sup>Me</sup> H)                                                                     | 1.872 /1.838                            | 4    |
| [Mn(O <sub>2</sub> )(TMC)] <sup>+</sup>                                                                                                        | 1.884                                   | 5    |
| [Mn(O <sub>2</sub> )(13-TMC)] <sup>+</sup>                                                                                                     | 1.855 / 1.863                           | 6    |
| [Mn(O <sub>2</sub> )(12-TMC)] <sup>+</sup>                                                                                                     | 1.853                                   | 7    |
| [Mn <sup>III</sup> (OO <sup>t</sup> Bu)(S <sup>Me2</sup> N <sub>4</sub> (QuinoEN))] <sup>+</sup>                                               | 1.861                                   | 8    |
| [Mn <sup>III</sup> (OOCm)(S <sup>Me2</sup> N <sub>4</sub> (QuinoEN))] <sup>+</sup>                                                             | 1.841                                   | 8    |
| [Mn <sup>III</sup> (OO <sup>t</sup> Bu)(S <sup>Me2</sup> N <sub>4</sub> (QuinoPN))] <sup>+</sup>                                               | 1.840                                   | 9    |
| [Mn <sup>III</sup> (OO <sup>t</sup> Bu)(S <sup>Me2</sup> N <sub>4</sub> (6-Me-DPEN))] <sup>+</sup>                                             | 1.853                                   | 9    |
| [Mn <sup>III</sup> (OOCm)(S <sup>Me2</sup> N <sub>4</sub> (6-Me-DPEN))] <sup>+</sup>                                                           | 1.848                                   | 9    |
| [Mn <sup>III</sup> (OO <sup>t</sup> Bu)(S <sup>Me2</sup> N <sub>4</sub> (6-Me-DPPN))] <sup>+</sup>                                             | 1.843                                   | 9    |
| [Mn <sub>2</sub> <sup>III</sup> ( <i>trans</i> -1,2-O <sub>2</sub> )(S <sup>Me2</sup> N <sub>4</sub> (6-Me-DPEN)) <sub>2</sub> ] <sup>2+</sup> | 1.832                                   | 10   |
| [Mn <sup>III</sup> (S <sup>Me2</sup> N <sub>4</sub> (tren)(OPh- <i>p</i> NO <sub>2</sub> ))] <sup>+</sup>                                      | 1.901                                   | 11   |
| [Mn <sup>III</sup> (S <sup>Me2</sup> N <sub>4</sub> (tren)(OPh))] <sup>+</sup>                                                                 | 1.867                                   | 11   |
| [Mn <sup>III</sup> (S <sub>Me2</sub> N <sub>4</sub> (tren)(OMe))] <sup>+</sup>                                                                 | 1.836                                   | 11   |
| [Mn <sup>III</sup> (S <sub>Me2</sub> N <sub>4</sub> (tren))(OH)] <sup>+</sup>                                                                  | 1.854                                   | 11   |

**Table S2.** The O-O bond length of metal-superoxo complexes.

| complex                                                                                          | O-O (Å)             | ref. |
|--------------------------------------------------------------------------------------------------|---------------------|------|
| [Cu <sup>II</sup> (TMG <sub>3</sub> tren)( $\eta^1$ -O <sub>2</sub> <sup>•</sup> )] <sup>+</sup> | 1.280(3)            | 12   |
| [Cr <sup>III</sup> (14-TMC)(O <sub>2</sub> )(Cl)] <sup>+</sup>                                   | 1.231(6)            | 13   |
| [Fe <sup>III</sup> (TAML)(O <sub>2</sub> )] <sup>2-</sup>                                        | 1.323(3) / 1.306(7) | 14   |
| Co <sup>III</sup> (Tp <sup>Me2</sup> )(L <sup>Ph</sup> )(O <sub>2</sub> <sup>•</sup> )           | 1.301(5)            | 15   |

**Table S3.** Computed Spectroscopic Parameters for **2'** and **5'**.

|                                          | <b>2'</b>       | <b>5'</b>       |
|------------------------------------------|-----------------|-----------------|
| <i>D</i> (cm <sup>-1</sup> ), <i>E/D</i> | -3.1, 0.08      | -2.8, 0.11      |
| <i>A</i> <sub>x,y,z</sub> (MHz)          | -194, -183, -60 | -166, -164, -47 |

**Table S4.** Metal-superoxo bond lengths of mononuclear metal superoxo complexes by the B3LYP calculations

| Complex                                                                                            | Metal-O (Å) |
|----------------------------------------------------------------------------------------------------|-------------|
| Mn <sup>III</sup> (BDPP)(O <sub>2</sub> <sup>•</sup> ) ( <b>2</b> ) <i>S</i> = 3/2                 | 1.932       |
| Mn <sup>III</sup> (BDP <sup>Br</sup> P)(O <sub>2</sub> <sup>•</sup> ) ( <b>2'</b> ) <i>S</i> = 3/2 | 1.937       |
| Fe <sup>III</sup> (BDPP)(O <sub>2</sub> <sup>•</sup> ) ( <b>3</b> ) <i>S</i> = 3                   | 2.038       |
| Fe <sup>III</sup> (BDPP)(O <sub>2</sub> <sup>•</sup> ) <i>S</i> = 2                                | 1.927       |
| Co <sup>III</sup> (BDPP)(O <sub>2</sub> <sup>•</sup> ) ( <b>4</b> ) <i>S</i> = 1/2                 | 1.904       |

For **2**, **2'** and **4**, the strongly antibonding  $\sigma^*$  orbital with respect to the metal-superoxo interaction is vacant (Fig. 2, S15 and S16), but it is singly occupied for **3** (S15). In fact, the computed Fe-superoxo bond distance for the quintet state of **3**, which contains a high spin ferric center antiferromagnetic coupled to a superoxo radical, is comparable to those estimated for **2**, **2'** and **4**. This observation reflects the tradeoff between the enhanced Lewis acidity of Fe<sup>III</sup> relative to Mn<sup>III</sup> and the different occupation of the  $\sigma^*$  orbital. Thus, the weaker metal-superoxo bonding in **3** arises from the synergistic effect of its high spin center and the ferromagnetic coupling between the metal center and the superoxo ligand.<sup>16</sup>

**Table S5.** Coordinates of the optimized structures:Mn<sup>III</sup>(BDPP)(O<sub>2</sub>) (2):

|    |                   |                   |                   |
|----|-------------------|-------------------|-------------------|
| Mn | -1.49310707853518 | 10.62070401636536 | 8.32599976055327  |
| H  | -0.84052727955616 | 17.89033641991843 | 10.90627631645225 |
| H  | 5.01857969650649  | 11.26080589118739 | 10.73402742227351 |
| H  | 2.07503813535693  | 4.69710544057160  | 7.17726564893587  |
| H  | -6.52629979160194 | 5.68105357315492  | 5.16186779040529  |
| O  | -3.24166978381150 | 11.38799509030409 | 8.02900524329407  |
| O  | -3.67414027267409 | 12.38540561576013 | 8.73889422220261  |
| C  | 0.14622534588044  | 12.91909531175147 | 8.89420317066122  |
| C  | -0.10175819939280 | 14.32777139554240 | 9.48067608502189  |
| C  | -1.25039677166967 | 14.56342102057798 | 10.24525422320290 |
| H  | -1.93956318762866 | 13.73466405363135 | 10.40731447700653 |
| C  | -1.51079762708346 | 15.83900015954261 | 10.75611094238972 |
| H  | -2.41295124351058 | 16.01080940148165 | 11.34932715597300 |
| C  | -0.63111416155302 | 16.89485978040468 | 10.50572522119420 |
| C  | 0.51685892349555  | 16.66620033960102 | 9.74001798282374  |
| H  | 1.21463140476065  | 17.48265789959905 | 9.53463229871925  |
| C  | 0.78122712437718  | 15.38973374736062 | 9.23787936590845  |
| H  | 1.68990679752214  | 15.22651825550652 | 8.65561492712120  |
| C  | 1.54887194262492  | 12.46969719222107 | 9.36596705764002  |
| C  | 2.73958683059272  | 12.79531667872422 | 8.70057964326542  |
| H  | 2.71500331928337  | 13.37736517287429 | 7.77844432724151  |
| C  | 3.97994414641610  | 12.36899942252690 | 9.18659308766635  |
| H  | 4.88957689851170  | 12.63625731700067 | 8.64209549326547  |
| C  | 4.05404321691218  | 11.60804093254889 | 10.35443668331921 |
| C  | 2.87486989710584  | 11.29685339035780 | 11.04027114237799 |
| H  | 2.92024551233145  | 10.70946489236244 | 11.96124903998786 |
| C  | 1.64258364048388  | 11.73112271640251 | 10.55379545548812 |
| H  | 0.71758323045842  | 11.49274445394469 | 11.07828216750919 |
| C  | 0.03054424875374  | 13.01350794885808 | 7.33871011130346  |
| H  | 0.92560174913585  | 13.49914005568553 | 6.91415736805470  |
| C  | -1.22935184923215 | 13.78141861355586 | 6.88475407665857  |
| H  | -1.97189364236985 | 13.79093638171272 | 7.69038637713665  |

|   |                   |                   |                   |
|---|-------------------|-------------------|-------------------|
| H | -0.97223894775023 | 14.82627823552659 | 6.66723557592898  |
| C | -1.77725422560312 | 13.02753657281822 | 5.65407694949191  |
| H | -2.75641374083611 | 12.58670119431629 | 5.88264408708293  |
| H | -1.89349957099467 | 13.67868948992305 | 4.77560516984310  |
| C | -0.75659811348951 | 11.92502328627028 | 5.39325748774536  |
| H | 0.01636172848060  | 12.26694458237399 | 4.67525449574295  |
| H | -1.19829923760710 | 10.99144994844540 | 5.01360615265501  |
| C | 1.06911767983923  | 10.84907647110080 | 6.56677054854184  |
| H | 1.95803285176790  | 11.45646027571068 | 6.31653191108363  |
| H | 0.89929909586749  | 10.17687255315494 | 5.70992296512588  |
| C | 1.37718178772157  | 9.94743723234859  | 7.73670328778378  |
| C | 2.63036273687908  | 9.35639310753699  | 7.89098221968994  |
| H | 3.44894682225362  | 9.63872870375137  | 7.22748523312434  |
| C | 2.80255281499032  | 8.40870985846851  | 8.89768697164028  |
| H | 3.76845122084391  | 7.91949326496361  | 9.03974231178131  |
| C | 1.73067134844477  | 8.09084462052730  | 9.72844525722570  |
| H | 1.82770650367504  | 7.34300276009553  | 10.51720185330483 |
| C | 0.52183339522911  | 8.76020374383102  | 9.54559777832321  |
| C | -0.62042152643410 | 8.60130967639636  | 10.51590417775830 |
| H | -0.66663788248012 | 7.55661159889587  | 10.87325597294391 |
| H | -0.35694430627211 | 9.21816904305559  | 11.39034391872744 |
| C | -2.74101448079485 | 9.55216783923231  | 11.17267865456405 |
| H | -2.35186068527505 | 10.52434641557261 | 11.50887011882127 |
| H | -2.65827114126878 | 8.83461371509353  | 12.01292500613640 |
| C | -4.17621664612315 | 9.60827754301264  | 10.64886547286976 |
| H | -4.44157906791470 | 10.63166304101441 | 10.35420249288793 |
| H | -4.88441878685141 | 9.28416969140637  | 11.42500795408573 |
| C | -4.18950268671887 | 8.67571007509249  | 9.42026330828641  |
| H | -4.43180365654426 | 9.24320804804754  | 8.51485526213079  |
| H | -4.92545405682129 | 7.86561554583102  | 9.50545123073820  |
| C | -2.77069760270976 | 8.08653454225467  | 9.30624534264463  |
| H | -2.73621451277729 | 7.12167837903978  | 9.83941099533761  |
| C | -2.31040895284103 | 7.90001149803476  | 7.82128606759063  |
| C | -1.07750853439159 | 6.97291040085040  | 7.68970790982256  |
| C | -0.17128687132606 | 7.21511137761188  | 6.64631592956467  |

|   |                   |                   |                   |
|---|-------------------|-------------------|-------------------|
| H | -0.36474146799768 | 8.06470797694014  | 5.99178428969691  |
| C | 0.95143468263482  | 6.40845123817842  | 6.46143894261341  |
| H | 1.64565259605728  | 6.62661718534472  | 5.64537207714192  |
| C | 1.19475073916931  | 5.32914432652405  | 7.31853980673017  |
| C | 0.29061294423970  | 5.06106776063986  | 8.34797061782119  |
| H | 0.45851731829559  | 4.21467797376120  | 9.01920607693330  |
| C | -0.83338430907712 | 5.87509834869954  | 8.52874505418955  |
| H | -1.52070652810445 | 5.64004213160069  | 9.34287847250619  |
| C | -3.47360557149796 | 7.23740549304771  | 7.04698724005872  |
| C | -3.94687175692993 | 5.96061622361439  | 7.38178550972141  |
| H | -3.46126792055097 | 5.38588801440165  | 8.17257289458921  |
| C | -5.04258777707580 | 5.40654561529835  | 6.71644512752867  |
| H | -5.40984463131399 | 4.41920776592237  | 7.00850828330096  |
| C | -5.67193196848414 | 6.11499857852955  | 5.68738552998992  |
| C | -5.19788026001982 | 7.38186899170038  | 5.33982568349371  |
| H | -5.68621831426943 | 7.94838012985158  | 4.54232610685194  |
| C | -4.11182467742997 | 7.94251536066904  | 6.02026925654814  |
| H | -3.74931301861282 | 8.94133408108303  | 5.77955364122230  |
| N | -0.13031332963904 | 11.67191750508400 | 6.70888526860159  |
| N | 0.37594260786863  | 9.65378823960454  | 8.56720800832749  |
| N | -1.92108157411194 | 9.06864407721198  | 10.03754111049954 |
| O | -0.83880228711981 | 12.04660752668565 | 9.35677533812856  |
| O | -2.04512742008841 | 9.15377754296478  | 7.27301730742646  |

Mn<sup>III</sup>(BDP<sup>Br</sup>P)(O<sub>2</sub>') (2')

|    |                   |                   |                   |
|----|-------------------|-------------------|-------------------|
| Mn | -1.51895213447833 | 10.63764487741676 | 8.38349320521501  |
| Br | -0.69886924630518 | 18.67328640191320 | 11.34082736319431 |
| Br | 5.83028820189951  | 11.36773456966083 | 11.04635755294360 |
| Br | 2.56450232421277  | 4.10185962226560  | 6.86817348804085  |
| Br | -7.04650463447380 | 5.32476516131998  | 4.52275941149838  |
| O  | -3.25046321243856 | 11.46928666281454 | 8.13180343235474  |
| O  | -3.70563578810636 | 12.23377387734376 | 9.07203661888293  |
| C  | 0.16403311485209  | 12.98555612225928 | 8.84722230288068  |
| C  | -0.07967251569240 | 14.41405533912043 | 9.40893584770970  |

|   |                   |                   |                   |
|---|-------------------|-------------------|-------------------|
| C | -1.14945432086786 | 14.65182633004714 | 10.28131256437410 |
| H | -1.82859676885991 | 13.82872577998237 | 10.50831593980150 |
| C | -1.34886562116418 | 15.91552360797323 | 10.84999674238523 |
| H | -2.18025612174042 | 16.08700596102225 | 11.53671489706009 |
| C | -0.47157408926745 | 16.95524776419527 | 10.53618233400430 |
| C | 0.58395009786854  | 16.75192216605784 | 9.64282181859021  |
| H | 1.25928086704623  | 17.57127996901351 | 9.38945836919177  |
| C | 0.77557710807385  | 15.48289661721714 | 9.09433367005859  |
| H | 1.62491870271034  | 15.33539653698615 | 8.42407692688164  |
| C | 1.58896229011548  | 12.59263542189372 | 9.33945946164418  |
| C | 2.77233638691858  | 12.90972316384025 | 8.65343135039126  |
| H | 2.73877140470569  | 13.43117095736294 | 7.69547177903210  |
| C | 4.03164490604418  | 12.56340866797068 | 9.15513013643115  |
| H | 4.93424262047361  | 12.81643446378240 | 8.59591219812835  |
| C | 4.12056971861702  | 11.89000717167201 | 10.37276009886100 |
| C | 2.96332172004586  | 11.59097211465942 | 11.09806655048970 |
| H | 3.03874811976159  | 11.07961871509721 | 12.05948095232366 |
| C | 1.71680208039033  | 11.94723493165507 | 10.57986661930432 |
| H | 0.80930801088285  | 11.71676691565925 | 11.13995191228821 |
| C | 0.03915535867764  | 13.01807686338296 | 7.28430485676101  |
| H | 0.93392518274367  | 13.48158333401761 | 6.83245170734228  |
| C | -1.21792363020898 | 13.77610768830851 | 6.79106910805497  |
| H | -1.97154596558760 | 13.82366672656190 | 7.58641731724972  |
| H | -0.95650898762018 | 14.81123195254483 | 6.53254665537519  |
| C | -1.75507939939716 | 12.98006021293985 | 5.57936828791997  |
| H | -2.73844916999840 | 12.54759768381982 | 5.81040592321553  |
| H | -1.86396403763088 | 13.60179200678189 | 4.67842686101875  |
| C | -0.72959721525393 | 11.86969403675116 | 5.36723571121618  |
| H | 0.05678616732264  | 12.19402589379667 | 4.65513599591034  |
| H | -1.16526075428505 | 10.92927984698939 | 4.99670449383439  |
| C | 1.06456732236963  | 10.80229164895816 | 6.60948810095341  |
| H | 1.96510751655431  | 11.38854198747787 | 6.34802322656000  |
| H | 0.89775089738668  | 10.10765300890686 | 5.76953491118417  |
| C | 1.35690506111960  | 9.92536409352627  | 7.81073801149918  |
| C | 2.61400521721329  | 9.34588580703825  | 7.99504132921536  |

|   |                   |                   |                   |
|---|-------------------|-------------------|-------------------|
| H | 3.43755478309707  | 9.60684445798512  | 7.32763960927968  |
| C | 2.78905786223767  | 8.43842633039606  | 9.03964476958529  |
| H | 3.76115559140527  | 7.97116587299995  | 9.21234661463829  |
| C | 1.70944611929002  | 8.13387575382380  | 9.86716390001944  |
| H | 1.81094277550215  | 7.41776407882897  | 10.68539352730576 |
| C | 0.48770589893565  | 8.77217970270913  | 9.64109699885035  |
| C | -0.67704941577576 | 8.58453665479576  | 10.58838263871250 |
| H | -0.70106651169894 | 7.53703303114839  | 10.94380607193627 |
| H | -0.44322248354237 | 9.19857143792281  | 11.47409081902687 |
| C | -2.82894904484766 | 9.43686618944339  | 11.26576831970328 |
| H | -2.50068100016645 | 10.42788558044328 | 11.61231037992928 |
| H | -2.67910689732079 | 8.71703005504197  | 12.09432528065135 |
| C | -4.28317353294754 | 9.40310568190992  | 10.78605524801321 |
| H | -4.66293109921776 | 10.41753699631108 | 10.60648219931047 |
| H | -4.92761456753490 | 8.93523755851250  | 11.54522614532995 |
| C | -4.25137465425307 | 8.59519255547742  | 9.47272899061343  |
| H | -4.46709505971736 | 9.24928168863843  | 8.61901106359643  |
| H | -4.98745001341148 | 7.78032947671982  | 9.45261854915960  |
| C | -2.82204722955437 | 8.03287118155913  | 9.34379760153004  |
| H | -2.77193805417610 | 7.05851950951650  | 9.86221153172001  |
| C | -2.36899017132657 | 7.88158179381403  | 7.84438629947087  |
| C | -1.15015452108834 | 6.92807294256801  | 7.66505992698906  |
| C | -0.29887676309092 | 7.13137539814572  | 6.56569279557274  |
| H | -0.50574296367005 | 7.97239482930868  | 5.90219469883847  |
| C | 0.79096877956919  | 6.29654688387751  | 6.31348472205533  |
| H | 1.44155309388061  | 6.47991672329246  | 5.45600937915007  |
| C | 1.04948024773455  | 5.22483895923977  | 7.17481211930087  |
| C | 0.20552291674337  | 4.97418191488065  | 8.25721393078768  |
| H | 0.39535545874947  | 4.12868671469919  | 8.92097426299395  |
| C | -0.88317966505510 | 5.82384762614396  | 8.49076087158757  |
| H | -1.52543088192492 | 5.59776636220494  | 9.34434093633718  |
| C | -3.52991698724387 | 7.23409099348480  | 7.03331364605176  |
| C | -4.00338240857447 | 5.94261230991513  | 7.31682230478371  |
| H | -3.55285075377401 | 5.35180342299150  | 8.11747270517795  |
| C | -5.04901918301018 | 5.37268180070748  | 6.58701894684947  |



|   |                   |                   |                   |
|---|-------------------|-------------------|-------------------|
| H | -5.41233656423509 | 4.37268829902008  | 6.83092442008144  |
| C | -5.62508382597893 | 6.09723013056092  | 5.53905436694107  |
| C | -5.17122740896267 | 7.38067065068941  | 5.23323664242497  |
| H | -5.63006793937309 | 7.94465116644820  | 4.41885126476371  |
| C | -4.13235311616938 | 7.94154370325136  | 5.98483328970997  |
| H | -3.77763327829933 | 8.94864361278806  | 5.76512122999060  |
| N | -0.12927467238321 | 11.64914899284981 | 6.70523673792535  |
| N | 0.34548613162024  | 9.64321773996093  | 8.63886387226109  |
| N | -1.99276732827259 | 9.02274485528116  | 10.10428925422039 |
| O | -0.80063127784808 | 12.11167705041748 | 9.34577880317703  |
| O | -2.09516616894922 | 9.14875864727107  | 7.33209727237414  |

Fe<sup>III</sup>(BDPP)(O<sub>2</sub><sup>•</sup>) (**3**) (*S* = 3):

|    |           |           |           |
|----|-----------|-----------|-----------|
| Fe | 1.951648  | 3.352647  | 18.365824 |
| O  | 0.285517  | 4.462169  | 18.745998 |
| O  | -0.876834 | 4.759570  | 19.116170 |
| O  | 2.833465  | 4.863863  | 17.547830 |
| O  | 1.052787  | 1.817025  | 19.106950 |
| N  | 1.653766  | 2.798412  | 16.170781 |
| N  | 3.669333  | 2.136842  | 17.951469 |
| N  | 3.020375  | 3.255953  | 20.393969 |
| C  | 3.042481  | 4.906006  | 16.174129 |
| C  | 2.997345  | 6.366250  | 15.668693 |
| C  | 2.936758  | 7.410335  | 16.596526 |
| H  | 2.896584  | 7.152372  | 17.655029 |
| C  | 2.919853  | 8.742954  | 16.171503 |
| H  | 2.876557  | 9.546315  | 16.911940 |
| C  | 2.952216  | 9.051074  | 14.809845 |
| H  | 2.936610  | 10.091720 | 14.474851 |
| C  | 3.003469  | 8.013182  | 13.874669 |
| H  | 3.027005  | 8.240881  | 12.805231 |
| C  | 3.032844  | 6.684384  | 14.302147 |
| H  | 3.088284  | 5.893503  | 13.551646 |
| C  | 4.454263  | 4.384669  | 15.804342 |

|   |           |          |           |
|---|-----------|----------|-----------|
| C | 4.795061  | 3.908142 | 14.529605 |
| H | 4.042074  | 3.845946 | 13.742822 |
| C | 6.100729  | 3.504588 | 14.233239 |
| H | 6.340118  | 3.126322 | 13.235452 |
| C | 7.097121  | 3.577918 | 15.207811 |
| H | 8.116343  | 3.257351 | 14.976144 |
| C | 6.773102  | 4.066065 | 16.478105 |
| H | 7.545431  | 4.138159 | 17.248550 |
| C | 5.467992  | 4.464441 | 16.768845 |
| H | 5.201173  | 4.849526 | 17.753066 |
| C | 1.897733  | 4.097529 | 15.479969 |
| H | 2.140652  | 3.889842 | 14.423606 |
| C | 0.540784  | 4.819309 | 15.562749 |
| H | 0.550594  | 5.520788 | 16.405916 |
| H | 0.370903  | 5.411265 | 14.654557 |
| C | -0.525014 | 3.722580 | 15.777061 |
| H | -1.071251 | 3.895062 | 16.712317 |
| H | -1.267050 | 3.691865 | 14.965672 |
| C | 0.260156  | 2.411271 | 15.839734 |
| H | -0.104990 | 1.710130 | 16.604147 |
| H | 0.247036  | 1.898581 | 14.858410 |
| C | 2.582778  | 1.703648 | 15.849439 |
| H | 2.030040  | 0.761840 | 15.998436 |
| H | 2.891602  | 1.733006 | 14.789673 |
| C | 3.794725  | 1.605775 | 16.740032 |
| C | 4.942230  | 0.897190 | 16.386978 |
| H | 5.059221  | 0.495760 | 15.379724 |
| C | 5.925482  | 0.708761 | 17.357336 |
| H | 6.825974  | 0.139606 | 17.116403 |
| C | 5.751541  | 1.244894 | 18.633604 |
| H | 6.498195  | 1.093230 | 19.415130 |
| C | 4.601447  | 1.994393 | 18.885812 |
| C | 4.392502  | 2.768175 | 20.167098 |
| H | 5.040078  | 3.656274 | 20.092044 |
| H | 4.757724  | 2.185440 | 21.030630 |

|   |           |           |           |
|---|-----------|-----------|-----------|
| C | 3.055264  | 4.540085  | 21.137136 |
| H | 3.417279  | 5.334204  | 20.467785 |
| H | 3.758516  | 4.451924  | 21.988932 |
| C | 1.628745  | 4.749664  | 21.636718 |
| H | 1.055628  | 5.350918  | 20.920507 |
| H | 1.618684  | 5.281096  | 22.598995 |
| C | 1.038065  | 3.327979  | 21.735414 |
| H | 0.775763  | 3.045185  | 22.763629 |
| H | 0.121751  | 3.257080  | 21.141224 |
| C | 2.109070  | 2.364306  | 21.182042 |
| H | 2.682118  | 1.934540  | 22.021312 |
| C | 1.487167  | 1.234272  | 20.289767 |
| C | 2.475360  | 0.081993  | 19.998586 |
| C | 2.332752  | -0.604720 | 18.783724 |
| H | 1.542683  | -0.279014 | 18.106028 |
| C | 3.181924  | -1.656780 | 18.444243 |
| H | 3.053287  | -2.170806 | 17.487793 |
| C | 4.195135  | -2.058416 | 19.322282 |
| H | 4.865068  | -2.879456 | 19.054820 |
| C | 4.331964  | -1.403157 | 20.546736 |
| H | 5.108321  | -1.711114 | 21.252251 |
| C | 3.475098  | -0.348176 | 20.881859 |
| H | 3.607946  | 0.141041  | 21.847862 |
| C | 0.281219  | 0.630910  | 21.046256 |
| C | 0.435500  | -0.184631 | 22.175498 |
| H | 1.432901  | -0.452694 | 22.528199 |
| C | -0.679293 | -0.685683 | 22.852910 |
| H | -0.536486 | -1.323716 | 23.729311 |
| C | -1.968730 | -0.374115 | 22.411408 |
| H | -2.839526 | -0.767652 | 22.941745 |
| C | -2.130114 | 0.439420  | 21.285979 |
| H | -3.131925 | 0.697205  | 20.930614 |
| C | -1.013508 | 0.934236  | 20.607039 |
| H | -1.122109 | 1.566035  | 19.725039 |

Fe<sup>III</sup>(BDPP)(O<sub>2</sub><sup>•</sup>) (*S* = 2):

|    |           |           |           |
|----|-----------|-----------|-----------|
| Fe | 1.909703  | 3.383413  | 18.376237 |
| O  | 0.365561  | 4.489157  | 18.699610 |
| O  | -0.775402 | 4.154883  | 19.184275 |
| O  | 2.855915  | 4.850910  | 17.555327 |
| O  | 1.064975  | 1.824708  | 19.099184 |
| N  | 1.624922  | 2.818869  | 16.190800 |
| N  | 3.635978  | 2.161124  | 17.956186 |
| N  | 2.994223  | 3.289285  | 20.382581 |
| C  | 3.057850  | 4.895736  | 16.179487 |
| C  | 3.028399  | 6.358998  | 15.681632 |
| C  | 2.955700  | 7.400104  | 16.611682 |
| H  | 2.896735  | 7.139749  | 17.668638 |
| C  | 2.949081  | 8.733844  | 16.189768 |
| H  | 2.896020  | 9.535270  | 16.931631 |
| C  | 3.003313  | 9.045495  | 14.829583 |
| H  | 2.995790  | 10.087052 | 14.497154 |
| C  | 3.066519  | 8.010149  | 13.892279 |
| H  | 3.107961  | 8.240761  | 12.824021 |
| C  | 3.086481  | 6.680305  | 14.316728 |
| H  | 3.153008  | 5.890655  | 13.565919 |
| C  | 4.460140  | 4.359650  | 15.797812 |
| C  | 4.781836  | 3.864446  | 14.525222 |
| H  | 4.017817  | 3.792817  | 13.749899 |
| C  | 6.082439  | 3.453914  | 14.216279 |
| H  | 6.306620  | 3.061223  | 13.220597 |
| C  | 7.092637  | 3.538265  | 15.175512 |
| H  | 8.107864  | 3.212537  | 14.933786 |
| C  | 6.787497  | 4.044507  | 16.443488 |
| H  | 7.570732  | 4.125974  | 17.201879 |
| C  | 5.487657  | 4.450676  | 16.746652 |
| H  | 5.236587  | 4.853051  | 17.728181 |
| C  | 1.895054  | 4.109164  | 15.490955 |
| H  | 2.134642  | 3.886594  | 14.437121 |

|   |           |          |           |
|---|-----------|----------|-----------|
| C | 0.552013  | 4.858120 | 15.564311 |
| H | 0.571297  | 5.563782 | 16.403378 |
| H | 0.397664  | 5.445519 | 14.650277 |
| C | -0.535150 | 3.783476 | 15.784442 |
| H | -1.076674 | 3.968451 | 16.720033 |
| H | -1.275500 | 3.760239 | 14.971228 |
| C | 0.223178  | 2.457556 | 15.860604 |
| H | -0.157561 | 1.771430 | 16.630926 |
| H | 0.204900  | 1.935079 | 14.884896 |
| C | 2.532405  | 1.705075 | 15.873799 |
| H | 1.967993  | 0.774067 | 16.043928 |
| H | 2.827492  | 1.716177 | 14.809946 |
| C | 3.751115  | 1.611064 | 16.752705 |
| C | 4.894203  | 0.895293 | 16.400344 |
| H | 5.001310  | 0.478532 | 15.398320 |
| C | 5.886942  | 0.722309 | 17.363638 |
| H | 6.784936  | 0.149119 | 17.123241 |
| C | 5.725277  | 1.280048 | 18.632230 |
| H | 6.479040  | 1.141520 | 19.409309 |
| C | 4.577521  | 2.032918 | 18.882970 |
| C | 4.374404  | 2.826839 | 20.150752 |
| H | 5.001652  | 3.726626 | 20.049876 |
| H | 4.758331  | 2.267881 | 21.021797 |
| C | 3.006639  | 4.578652 | 21.119923 |
| H | 3.339640  | 5.376598 | 20.440144 |
| H | 3.725146  | 4.511091 | 21.960286 |
| C | 1.583243  | 4.755027 | 21.639440 |
| H | 0.985005  | 5.332924 | 20.924514 |
| H | 1.573450  | 5.293312 | 22.597790 |
| C | 1.028515  | 3.320278 | 21.754222 |
| H | 0.796101  | 3.033274 | 22.788421 |
| H | 0.102146  | 3.237236 | 21.178057 |
| C | 2.107280  | 2.378690 | 21.179253 |
| H | 2.701095  | 1.953579 | 22.005685 |
| C | 1.499398  | 1.242843 | 20.285375 |

|   |           |           |           |
|---|-----------|-----------|-----------|
| C | 2.496316  | 0.097079  | 19.999847 |
| C | 2.350764  | -0.605683 | 18.794396 |
| H | 1.554673  | -0.293946 | 18.117198 |
| C | 3.202836  | -1.658084 | 18.463693 |
| H | 3.071792  | -2.184479 | 17.514337 |
| C | 4.221305  | -2.045072 | 19.342381 |
| H | 4.892561  | -2.867430 | 19.082480 |
| C | 4.361469  | -1.373626 | 20.557605 |
| H | 5.141820  | -1.670082 | 21.263589 |
| C | 3.502485  | -0.317337 | 20.883231 |
| H | 3.637635  | 0.183907  | 21.842728 |
| C | 0.290294  | 0.628915  | 21.029212 |
| C | 0.445036  | -0.210528 | 22.140753 |
| H | 1.442463  | -0.486426 | 22.487161 |
| C | -0.669547 | -0.724859 | 22.808882 |
| H | -0.526039 | -1.380910 | 23.671841 |
| C | -1.958927 | -0.404069 | 22.374225 |
| H | -2.829803 | -0.808474 | 22.896323 |
| C | -2.120158 | 0.434090  | 21.266907 |
| H | -3.121594 | 0.701590  | 20.917752 |
| C | -1.004508 | 0.943683  | 20.597569 |
| H | -1.117489 | 1.600593  | 19.735024 |

Co<sup>III</sup>(BDPP)(O<sub>2</sub><sup>\*</sup>) (4):

|    |           |           |           |
|----|-----------|-----------|-----------|
| Co | -0.077080 | -0.177359 | 0.993453  |
| O  | -0.258990 | -0.663318 | 2.825244  |
| O  | 0.231315  | 0.093113  | 3.758649  |
| O  | 0.078293  | 1.674319  | 1.353370  |
| O  | -0.272041 | -2.020381 | 0.611320  |
| N  | -2.045306 | 0.158401  | 0.719370  |
| N  | 0.049713  | 0.153122  | -0.875805 |
| N  | 1.911880  | -0.452879 | 0.870809  |
| C  | -1.027034 | 0.498075  | -2.939850 |
| C  | -1.075789 | 0.261718  | -1.568966 |

|   |           |           |           |
|---|-----------|-----------|-----------|
| C | -2.299792 | 0.006411  | -0.741522 |
| C | -2.968079 | -0.754285 | 1.458675  |
| C | -3.137321 | -0.168425 | 2.860228  |
| C | -2.615563 | 1.280236  | 2.762915  |
| C | -2.299512 | 1.537725  | 1.281785  |
| C | -2.018398 | 4.701516  | 1.835953  |
| C | -2.072141 | 5.769419  | 2.736160  |
| C | -1.218165 | 5.797305  | 3.844148  |
| C | -0.320714 | 4.744283  | 4.045219  |
| C | -0.273970 | 3.672399  | 3.147912  |
| C | -1.119333 | 3.643014  | 2.031497  |
| C | -2.072400 | 3.311356  | -1.183422 |
| C | -1.911451 | 3.887715  | -2.448854 |
| C | -0.637357 | 4.206072  | -2.919519 |
| C | 0.473364  | 3.954795  | -2.106519 |
| C | 0.306002  | 3.381221  | -0.847160 |
| C | -0.966518 | 3.034074  | -0.368043 |
| C | -1.047054 | 2.438184  | 1.060376  |
| C | 0.227444  | 0.586037  | -3.548015 |
| C | 1.390635  | 0.445190  | -2.787853 |
| C | 1.256681  | 0.236266  | -1.418835 |
| C | 2.356138  | 0.182643  | -0.401260 |
| C | 2.668343  | 0.133956  | 2.035445  |
| C | 3.094036  | -1.040969 | 2.920565  |
| C | 2.294273  | -2.241512 | 2.408708  |
| C | 2.106140  | -1.955461 | 0.920723  |
| C | 1.753827  | -5.120935 | 0.427691  |
| C | 1.689050  | -6.406919 | 0.970038  |
| C | 0.698522  | -6.727022 | 1.904817  |
| C | -0.219133 | -5.748385 | 2.296256  |
| C | -0.147967 | -4.460343 | 1.757300  |
| C | 0.836478  | -4.133365 | 0.816617  |
| C | 2.245045  | -2.874162 | -1.972223 |
| C | 2.277359  | -3.022655 | -3.363558 |
| C | 1.088383  | -3.114240 | -4.087316 |

|   |           |           |           |
|---|-----------|-----------|-----------|
| C | -0.132188 | -3.065853 | -3.404858 |
| C | -0.157185 | -2.916869 | -2.019181 |
| C | 1.028859  | -2.804197 | -1.277907 |
| C | 0.896127  | -2.689463 | 0.262207  |
| H | -1.944984 | 0.611657  | -3.517540 |
| H | -2.575937 | -1.045427 | -0.905548 |
| H | -3.150784 | 0.629479  | -1.058651 |
| H | -3.935408 | -0.764591 | 0.926515  |
| H | -2.534163 | -1.761571 | 1.430604  |
| H | -4.192881 | -0.215113 | 3.166958  |
| H | -2.548948 | -0.735646 | 3.590016  |
| H | -3.337759 | 2.022058  | 3.127366  |
| H | -1.704361 | 1.392765  | 3.357224  |
| H | -3.192894 | 1.944081  | 0.781375  |
| H | -2.671487 | 4.710510  | 0.961404  |
| H | -2.775134 | 6.588976  | 2.560871  |
| H | -1.249429 | 6.637883  | 4.543177  |
| H | 0.345218  | 4.751842  | 4.912726  |
| H | 0.405171  | 2.832740  | 3.297710  |
| H | -3.082415 | 3.081797  | -0.840790 |
| H | -2.790306 | 4.095896  | -3.064732 |
| H | -0.508451 | 4.660272  | -3.905043 |
| H | 1.474739  | 4.217039  | -2.459677 |
| H | 1.160917  | 3.186191  | -0.198020 |
| H | 0.300512  | 0.767580  | -4.622339 |
| H | 2.377449  | 0.500495  | -3.248944 |
| H | 2.622678  | 1.222591  | -0.166717 |
| H | 3.254972  | -0.317153 | -0.795133 |
| H | 3.536333  | 0.690365  | 1.653816  |
| H | 1.996805  | 0.834895  | 2.545026  |
| H | 4.175123  | -1.226990 | 2.808452  |
| H | 2.890453  | -0.835621 | 3.980220  |
| H | 2.813207  | -3.196335 | 2.560821  |
| H | 1.318017  | -2.302976 | 2.901074  |
| H | 3.047406  | -2.188242 | 0.397801  |



|   |           |           |           |
|---|-----------|-----------|-----------|
| H | 2.518641  | -4.894414 | -0.317914 |
| H | 2.409504  | -7.165734 | 0.652668  |
| H | 0.640582  | -7.734002 | 2.326067  |
| H | -0.993565 | -5.988359 | 3.030075  |
| H | -0.843165 | -3.677578 | 2.059632  |
| H | 3.193321  | -2.815657 | -1.436063 |
| H | 3.239202  | -3.073881 | -3.881112 |
| H | 1.110989  | -3.239610 | -5.172953 |
| H | -1.070497 | -3.153870 | -3.958976 |
| H | -1.101134 | -2.884801 | -1.473712 |

## References

1. Aasa, R.; Vänngård, T. EPR Signal Intensity and Powder Shapes: A Reexamination. *J. Magn. Reson.* **1975**, *19* (3), 308–315.
2. VanAtta, R. B.; Strouse, C. E.; Hanson, L. K.; Valentine, J. S. Peroxo(tetraphenylporphinato)manganese(III) and chloro(tetraphenylporphinato)manganese(II) Anions. Synthesis, crystal Structures, and electronic Structures. *J. Am. Chem. Soc.* **1987**, *109*, 1425-1434.
3. Brown, P. M.; Caradoc-Davies, T. T.; Dickson, J. M. J.; Cooper, G. J. S.; Loomes, K. M.; Baker, E. N. Crystal Structure of a Substrate Complex of Myo-inositol Oxygenase, a Di-Iron Oxygenase with a Key Role in Inositol Metabolism. *Proc. Natl. Acad. Sci. U. S. A.* **2006**, *103*, 15032-15037.
4. Singh, U. P.; Sharma, A. K.; Hikichi, S.; Komatsuzaki, H.; Moro-oka, Y.; Akita, M. Hydrogen Bonding Interaction between Imidazolyl N–H Group and Peroxide: Stabilization of Mn(III)-Peroxo Complex  $\text{TpiPr}_2\text{Mn}(\eta^2\text{-O}_2)(\text{imMeH})$  (imMeH=2-methylimidazole). *Inorg. Chim. Acta* **2006**, *359*, 4407-4411.
5. Seo, M. S.; Kim, J. Y.; Annaraj, J.; Kim, Y.; Lee, Y.-M.; Kim, S.-J.; Kim, J.; Nam, W.  $[\text{Mn}(\text{tmc})(\text{O}_2)]^+$ : A Side-On Peroxido Manganese(III) Complex Bearing a Non-Heme Ligand. *Angew. Chem. Int. Ed.* **2007**, *46*, 377-380.
6. Annaraj, J.; Cho, J.; Lee, Y. M.; Kim, S. Y.; Latifi, R.; de Visser, S. P.; Nam, W. Structural Characterization and Remarkable Axial Ligand Effect on the Nucleophilic Reactivity of a Nonheme Manganese(III)-Peroxo Complex. *Angew. Chem. Int. Ed.* **2009**, *48*, 4150-4153.
7. Kang, H.; Cho, J.; Cho, K. B.; Nomura, T.; Ogura, T.; Nam, W. Mononuclear Manganese-Peroxo and Bis(mu-oxo)dimanganese Complexes Bearing a Common N-Methylated Macrocyclic Ligand. *Chem. Eur. J.* **2013**, *19*, 14119-14125.
8. Coggins, M. K.; Kovacs, J. A. Structural and Spectroscopic Characterization of Metastable Thiolate-Ligated Manganese(III)-Alkylperoxo Species. *J. Am. Chem. Soc.* **2011**, *133*, 12470-12473.
9. Coggins, M. K.; Martin-Diaconescu, V.; DeBeer, S.; Kovacs, J. A. Correlation Between Structural, Spectroscopic, and Reactivity Properties Within a Series of Structurally Analogous Metastable Manganese(III)-Alkylperoxo Complexes. *J. Am. Chem. Soc.* **2013**, *135*, 4260-4272.
10. Coggins, M. K.; Sun, X.; Kwak, Y.; Solomon, E. I.; Rybak-Akimova, E.; Kovacs, J. A. Characterization of Metastable Intermediates Formed in the Reaction Between a Mn(II) Complex and Dioxygen, Including a Crystallographic Structure of a Binuclear Mn(III)-Peroxo Species. *J. Am. Chem. Soc.* **2013**, *135*, 5631-5640.

11. Coggins, M. K.; Brines, L. M.; Kovacs, J. A. Synthesis and Structural Characterization of a Series of Mn<sup>III</sup>OR Complexes, Including a Water-Soluble Mn<sup>III</sup>OH That Promotes Aerobic Hydrogen-Atom Transfer. *Inorg. Chem.* **2013**, *52*, 12383-12393.
12. Schatz, M.; Raab, V.; Foxon, S. P.; Brehm, G.; Schneider, S.; Reiher, M.; Holthausen, M. C.; Sundermeyer, J.; Schindler, S. Combined Spectroscopic and Theoretical Evidence For a Persistent End-On Copper Superoxo Complex. *Angew. Chem. Int. Ed.* **2004**, *43*, 4360-4363.
13. Cho, J.; Woo, J.; Nam, W. An “End-On” Chromium(III)-Superoxo Complex: Crystallographic and Spectroscopic Characterization and Reactivity in C–H Bond Activation of Hydrocarbons. *J. Am. Chem. Soc.* **2010**, *132*, 5958-5959.
14. Hong, S.; Sutherlin, K. D.; Park, J.; Kwon, E.; Siegler, M. A.; Solomon, E. I.; Nam, W. Crystallographic and Spectroscopic Characterization and Reactivities of a Mononuclear Non-Haem Iron(III)-Superoxo complex. *Nat. Commun.* **2014**, *5*, 5440-5447.
15. Odon, F.; Chiba, Y.; Nakazawa, J.; Ohta, T.; Ogura, T.; Hikichi, S. Characterization of Mononuclear Non-heme Iron(III)-Superoxo Complex with a Five-Azole Ligand Set. *Angew. Chem. Int. Ed.* **2015**, *54*, 7336-7339.
16. Stout, H. D.; Kleespies, S. T.; Chiang, C. W.; Lee, W. Z.; Que, L., Jr.; Munck, E.; Bominaar, E. L., Spectroscopic and Theoretical Study of Spin-Dependent Electron Transfer in an Iron(III) Superoxo Complex. *Inorg. Chem.* **2016**, *55*, 5215-5226.
